# Supplementary material for: Synergistic integration of remote sensing and soil metagenomics data: advancing precision agriculture through interdisciplinary approaches
Source: Frontiers journal article supplement (doi:10.3389/fsufs.2024.1499973), 2025-01-06
Supplement: Data_Sheet_1.pdf [file Data_Sheet_1.pdf]

**Supplementary Table S1:** Certified Agricultural Drones and their Applications

| Country        | Certification                                 | UAV                      | Manufacturer                               | Application                                                                                |
|----------------|-----------------------------------------------|--------------------------|--------------------------------------------|--------------------------------------------------------------------------------------------|
| United States  | Federal Aviation Administration (FAA)         | DJI Agras T20            | Shenzhen DJI Sciences and Technologies Ltd | Crop spraying, seeding, and field mapping.                                                 |
|                |                                               | Senterra PHX             | Senterra                                   | Crop health monitoring, yield estimation, and field scouting.                              |
|                |                                               | PrecisionHawk Lancaster  | PrecisionHawk                              | Aerial imaging, NDVI (Normalized Difference Vegetation Index) analysis, and field mapping. |
| European Union | European Union Aviation Safety Agency (EASA)  | Parrot Bluegrass Fields  | Parrot                                     | Crop monitoring, soil analysis, and field mapping.                                         |
|                |                                               | Yamaha RMAX              | Yamaha Motor Co.                           | Crop spraying and pest control.                                                            |
|                |                                               | senseFly eBee Ag         | senseFly, a Swiss company                  | Crop health monitoring, field mapping, and land surveying.                                 |
| China          | Civil Aviation Administration of China (CAAC) | DJI Agras MG-1           | Shenzhen DJI Sciences and Technologies Ltd | Crop spraying, pest control, and fertilization.                                            |
|                |                                               | XAG P30                  | Xaircraft                                  | Precision spraying, seeding, and field mapping.                                            |
|                |                                               | TT Aviation Crop Sprayer | Beijing TT Aviation Technology Co. Ltd.    | Crop spraying and field scouting.                                                          |

|           |                                             |                              |                                            |                                                               |
|-----------|---------------------------------------------|------------------------------|--------------------------------------------|---------------------------------------------------------------|
| Australia | Civil Aviation Safety Authority (CASA)      | Altura Zenith                | Altura Zenith                              | Crop health monitoring, yield estimation, and field scouting. |
|           |                                             | Swoop Aero Kookaburra        | Swoop Aero                                 | Crop spraying and pest control.                               |
|           |                                             | Yamaha Fazer R               | Yamaha Motor Co.                           | Aerial imaging, field mapping, and crop monitoring.           |
| Japan     | Japan Civil Aviation Bureau(JCAB)           | Yamaha RMAX                  | Yamaha Motor Co.                           | Crop spraying and pest control.                               |
|           |                                             | DJI Agras T16                | Shenzhen DJI Sciences and Technologies Ltd | Crop spraying, fertilization, and field mapping.              |
|           |                                             | Nileworks Nile-T18           | Nileworks Inc.                             | Crop health monitoring, pest control, and field mapping.      |
| India     | Directorate General of Civil Aviation(DGCA) | Garuda Aerospace Kisan Drone | Garuda Aerospace Private Limited           | Crop spraying, seeding, and pest control.                     |
|           |                                             | Thanos V1200                 | Thanos Technologies                        | Crop health monitoring, soil analysis, and field mapping.     |
|           |                                             | Aarav Unmanned Systems AGRI  | Aarav Unmanned Systems                     | Aerial imaging, NDVI analysis, and field scouting.            |

### Supplementary Table S2:

IoT sensors used in precision agriculture, showcasing their role in enabling real-time, data-driven agricultural practices.

| Sensor Name          | Manufacturer                     | Data Type Collected                                         | Wireless Data Transfer Method         |
|----------------------|----------------------------------|-------------------------------------------------------------|---------------------------------------|
| Decagon EC-5         | METER Group                      | Soil moisture, electrical conductivity, temperature         | ZigBee, Bluetooth                     |
| Teros 12             | METER Group                      | Soil moisture, salinity, temperature                        | ZigBee, Wi-Fi                         |
| GreenSeeker          | Trimble Inc.                     | NDVI, crop health, nitrogen levels                          | Bluetooth, GSM                        |
| FluorPen FP110       | PSI (Photon Systems Instruments) | Photosynthetic activity, chlorophyll fluorescence           | USB, Bluetooth                        |
| PAR Sensor           | Apogee Instruments               | Photosynthetically Active Radiation (PAR) levels            | ZigBee                                |
| 10HS Moisture Sensor | METER Group                      | Soil moisture content                                       | ZigBee, Wi-Fi                         |
| SoilPro              | SoilPro Services                 | Soil pH and electrical conductivity                         | LoRa,Wi-Fi,Zigbee                     |
| Yara N-Sensor        | Yara International               | Nitrogen content in crops                                   | GPS,Wi-Fi                             |
| AquaSpy              | AquaSpy, Inc.                    | Root zone soil moisture and temperature                     | Wi-Fi,Bluetooth                       |
| PhenoCam             | Phenocam Network                 | Crop phenology (growth stages, canopy cover)                | Wi-Fi, Satellite Communication        |
| Parrot Sequoia       | Parrot SA                        | Multispectral imaging for plant health and nutrition        | Wi-Fi,Mobile Apps & Cloud Integration |
| Sentek Drill & Drop  | Sentek Technologies              | Soil moisture, temperature, and salinity at multiple depths | Wi-Fi,Cellular Networks               |
| Davis Vantage Pro2   | Davis Instruments                | Temperature, humidity, rainfall, wind speed/direction       | Wi-Fi, GSM, LoRa                      |
